# Supplementary material for: Antimicrobial Activity of Small Synthetic Peptides Based on the Marine Peptide Turgencin A: Prediction of Antimicrobial Peptide Sequences in a Natural Peptide and Strategy for Optimization of Potency
Source: Int J Mol Sci. 2020 Jul 30;21(15):5460. doi: 10.3390/ijms21155460 (PMC7432809; doi:10.3390/ijms21155460)
Supplement: Supplementary file 1 [file ijms-21-05460-s001.pdf]

## Supporting information

# Antimicrobial activity of small synthesized synthetic peptides based on the marine peptide turgencin A: prediction of antimicrobial peptide sequences in a natural peptide and strategy for optimization of potency

Ida K. Ø. Hansen <sup>1,\*</sup>, Tomas Lövdahl <sup>2</sup>, Danijela Simonovic <sup>2</sup>, Kine Ø. Hansen <sup>3</sup>, Aron J. C. Andersen <sup>1</sup>, Hege Devold <sup>1</sup>, Céline S. M. Richard <sup>1</sup>, Jeanette H. Andersen <sup>3</sup>, Morten B. Strøm <sup>2</sup> and Tor Haug <sup>1,\*</sup>

<sup>1</sup> Norwegian College of Fishery Science, Faculty of Biosciences, Fisheries and Economics, UiT The Arctic University of Norway, 9037 Tromsø, Norway; ajca@dtu.dk (A.J.C.A.); hege.devold@uit.no (H.D.); celine.s.richard@uit.no (C.S.M.R.)

<sup>2</sup> Department of Pharmacy, Faculty of Health Sciences, UiT The Arctic University of Norway, 9037 Tromsø, Norway; tlovdahl88@hotmail.com (T.L.); danijela.simonovic@uit.no (D.S.); morten.strom@uit.no (M.B.S.)

<sup>3</sup> Marbio, Faculty of Biosciences, Fisheries and Economics, UiT The Arctic University of Norway, Breivika, N-9037, Tromsø, Norway; kine.o.hanssen@uit.no (K.Ø.H.); jeanette.h.andersen@uit.no (J.H.A.)

### Table of contents

|                    |                                                                                                                                                                         |
|--------------------|-------------------------------------------------------------------------------------------------------------------------------------------------------------------------|
| <b>Figure S1.</b>  | Antimicrobial effect on membrane integrity as measured by RLU in <i>B. subtilis</i> (pCSS962) treated with chlorhexidine and different concentration of <b>StAMP-8</b>  |
| <b>Figure S2.</b>  | Antimicrobial effect on membrane integrity as measured by RLU in <i>B. subtilis</i> (pCSS962) treated with chlorhexidine and different concentration of <b>StAMP-9</b>  |
| <b>Figure S3.</b>  | Antimicrobial effect on membrane integrity as measured by RLU in <i>B. subtilis</i> (pCSS962) treated with chlorhexidine and different concentration of <b>StAMP-10</b> |
| <b>Figure S4.</b>  | Antimicrobial effect on membrane integrity as measured by RLU in <i>E. coli</i> (pCSS962) treated with chlorhexidine and different concentration of <b>StAMP-8</b>      |
| <b>Figure S5.</b>  | Antimicrobial effect on membrane integrity as measured by RLU in <i>E. coli</i> (pCSS962) treated with chlorhexidine and different concentration of <b>StAMP-9</b>      |
| <b>Figure S6.</b>  | Antimicrobial effect on membrane integrity as measured by RLU in <i>E. coli</i> (pCSS962) treated with chlorhexidine and different concentration of <b>StAMP-10</b>     |
| <b>Figure S7.</b>  | Antimicrobial effect on viability as measured by RLU in <i>B. subtilis</i> (pCGLS-11) treated with chlorhexidine and different concentration of <b>StAMP-8</b>          |
| <b>Figure S8.</b>  | Antimicrobial effect on viability as measured by RLU in <i>B. subtilis</i> (pCGLS-11) treated with chlorhexidine and different concentration of <b>StAMP-9</b>          |
| <b>Figure S9.</b>  | Antimicrobial effect on viability as measured by RLU in <i>B. subtilis</i> (pCGLS-11) treated with chlorhexidine and different concentration of <b>StAMP-10</b>         |
| <b>Figure S10.</b> | Antimicrobial effect on viability as measured by RLU in <i>E. coli</i> (pCGLS-11) treated with chlorhexidine and different concentration of <b>StAMP-8</b>              |
| <b>Figure S11.</b> | Antimicrobial effect on viability as measured by RLU in <i>E. coli</i> (pCGLS-11) treated with chlorhexidine and different concentration of <b>StAMP-9</b>              |

- Figure S12.** Antimicrobial effect on viability as measured by RLU in *E. coli* (pCGLS-11) treated with chlorhexidine and different concentration of **StAMP-10**
- Figure S13.** Antimicrobial effect on membrane integrity as measured by RLU in *B. subtilis* (pCSS962) treated with different concentrations of chlorhexidine
- Figure S14.** Antimicrobial effect on membrane integrity as measured by RLU in *E. coli* (pCSS962) treated with different concentrations of chlorhexidine
- Figure S15.** Antimicrobial effect on viability as measured by RLU in *B. subtilis* (pCGLS-11) treated with different concentrations of chlorhexidine
- Figure S16.** Antimicrobial effect on viability as measured by RLU in *E. coli* (pCGLS-11) treated with different concentrations of chlorhexidine
- Table S1.** Antimicrobial activity prediction of the designed StAMPs
- Table S2.** Molecular weight and purity of the StAMPs

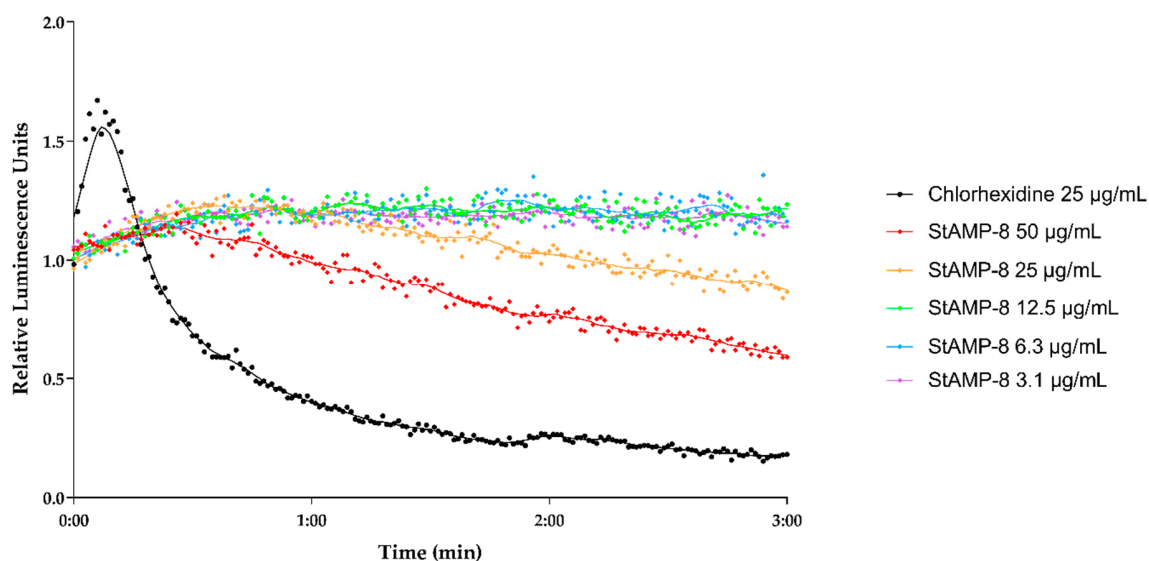

**Figure S1.** Kinetic of the antimicrobial effect on membrane integrity as measured by relative luminescence in *B. subtilis* (pCSS962) treated with chlorhexidine and different concentration of **StAMP-8**.

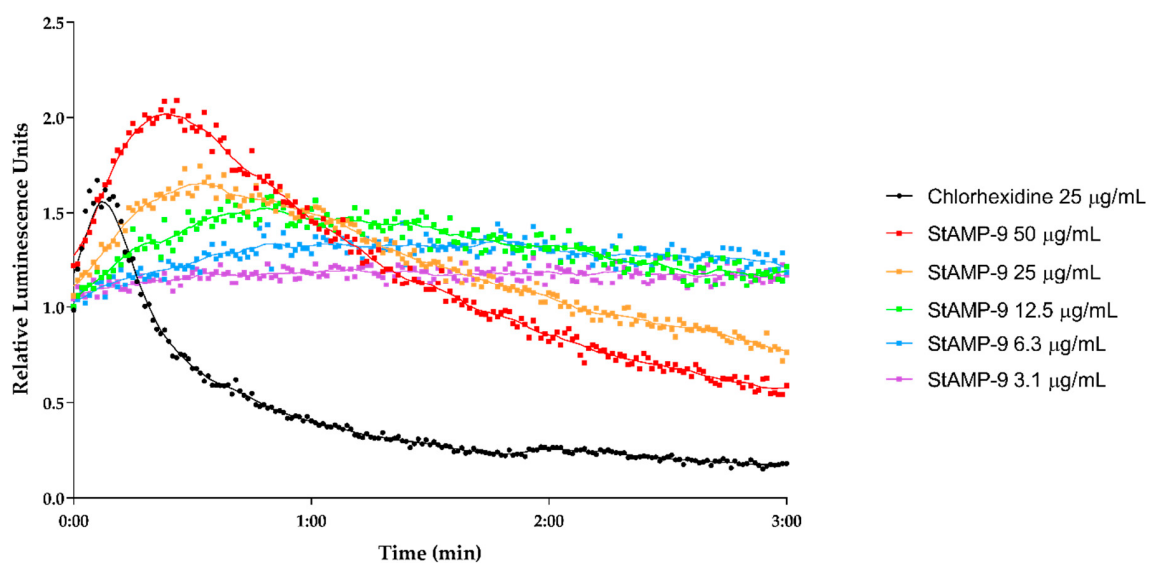

**Figure S2.** Kinetic of the antimicrobial effect on membrane integrity as measured by relative luminescence in *B. subtilis* (pCSS962) treated with chlorhexidine and different concentration of **StAMP-9**.

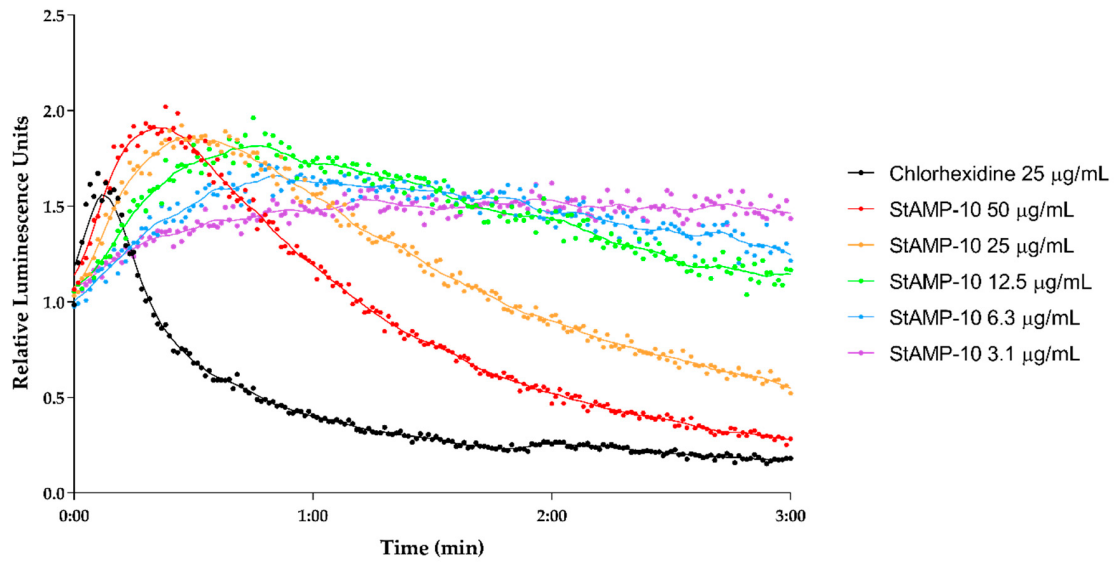

**Figure S3.** Kinetic of the antimicrobial effect on membrane integrity as measured by relative luminescence in *B. subtilis* (pCSS962) treated with chlorhexidine and different concentration of **StAMP-10**.

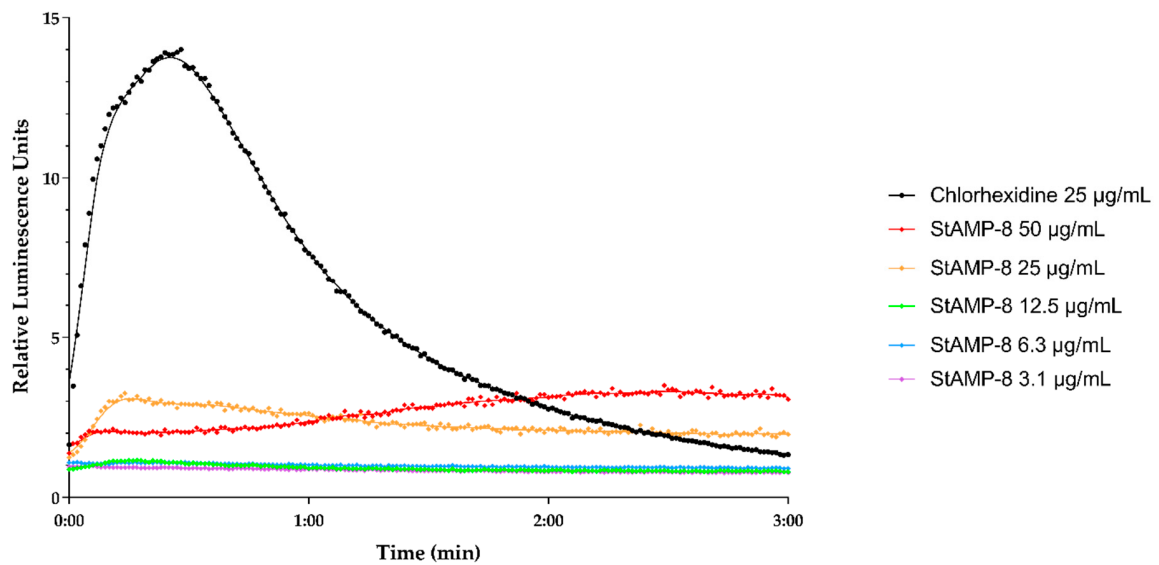

**Figure S4.** Kinetic of the antimicrobial effect on membrane integrity as measured by relative luminescence in *E. coli* (pCSS962) treated with chlorhexidine and different concentration of **StAMP-8**.

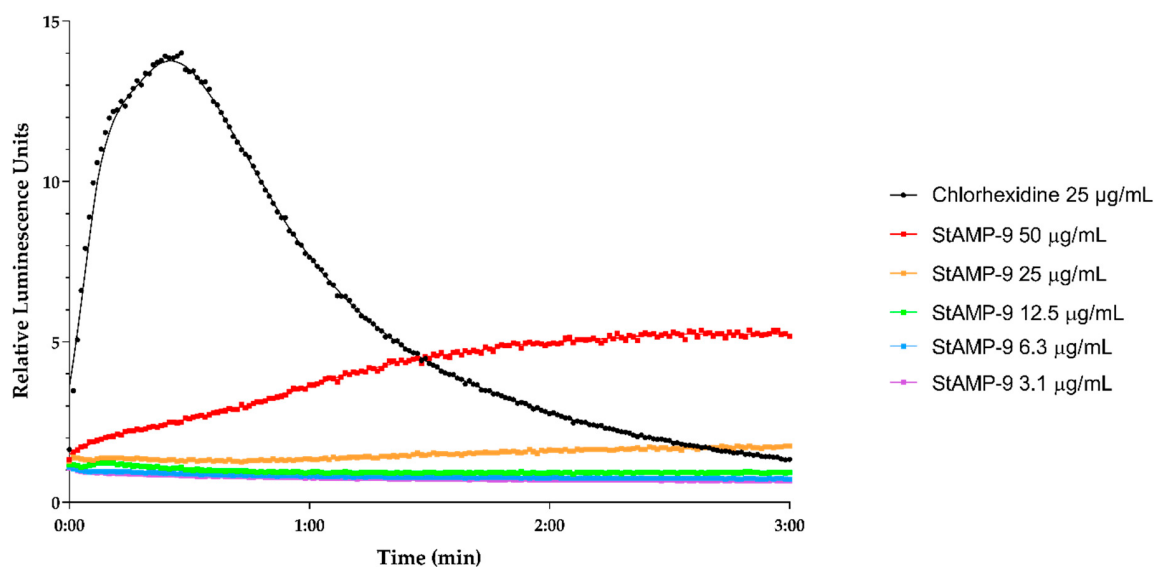

**Figure S5.** Kinetic of the antimicrobial effect on membrane integrity as measured by relative luminescence in *E. coli* (pCSS962) treated with chlorhexidine and different concentration of StAMP-9.

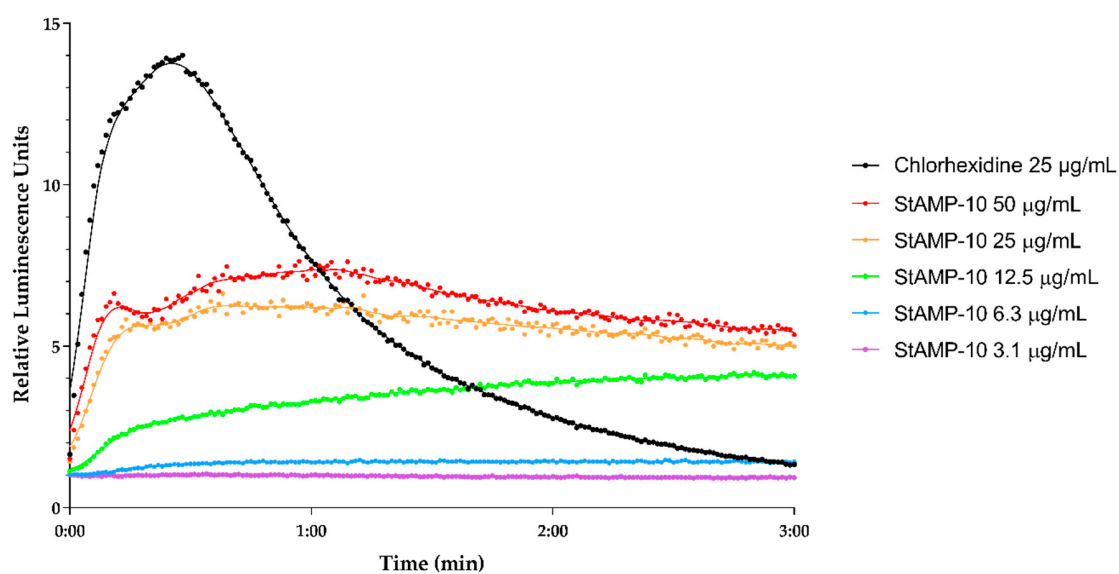

**Figure S6.** Kinetic of the antimicrobial effect on membrane integrity as measured by relative luminescence in *E. coli* (pCSS962) treated with chlorhexidine and different concentration of StAMP-10.

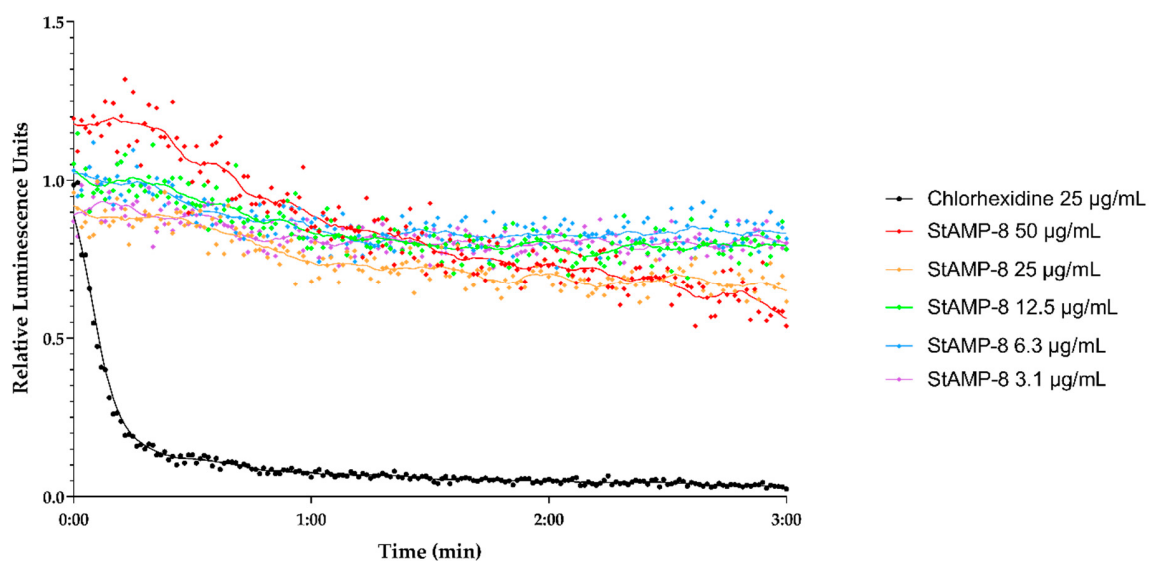

**Figure S7.** Kinetic of the antimicrobial effect on viability as measured by relative luminescence in *B. subtilis* (pCGLS-11) treated with chlorhexidine and different concentration of **StAMP-8**.

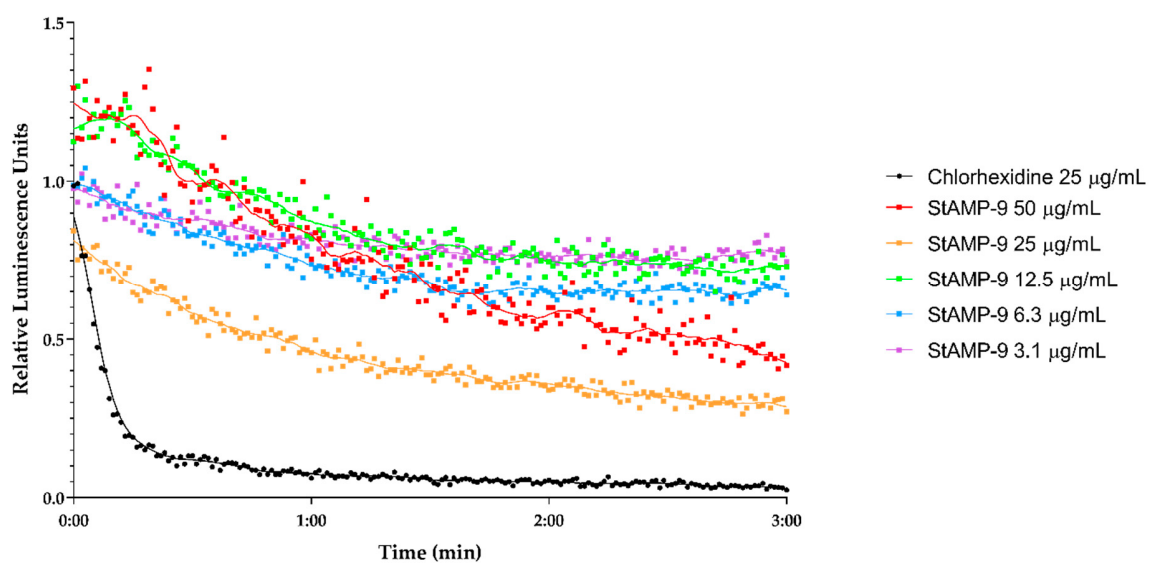

**Figure S8.** Kinetic of the antimicrobial effect on viability as measured by relative luminescence in *B. subtilis* (pCGLS-11) treated with chlorhexidine and different concentration of **StAMP-9**.

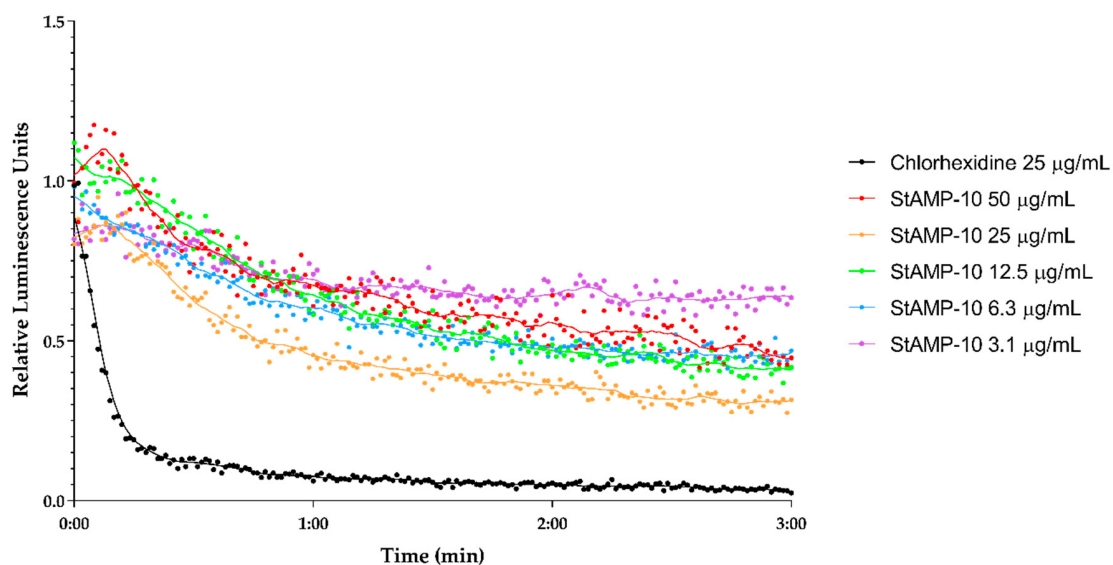

**Figure S9.** Kinetic of the antimicrobial effect on viability as measured by relative luminescence in *B. subtilis* (pCGLS-11) treated with chlorhexidine and different concentration of **StAMP-10**.

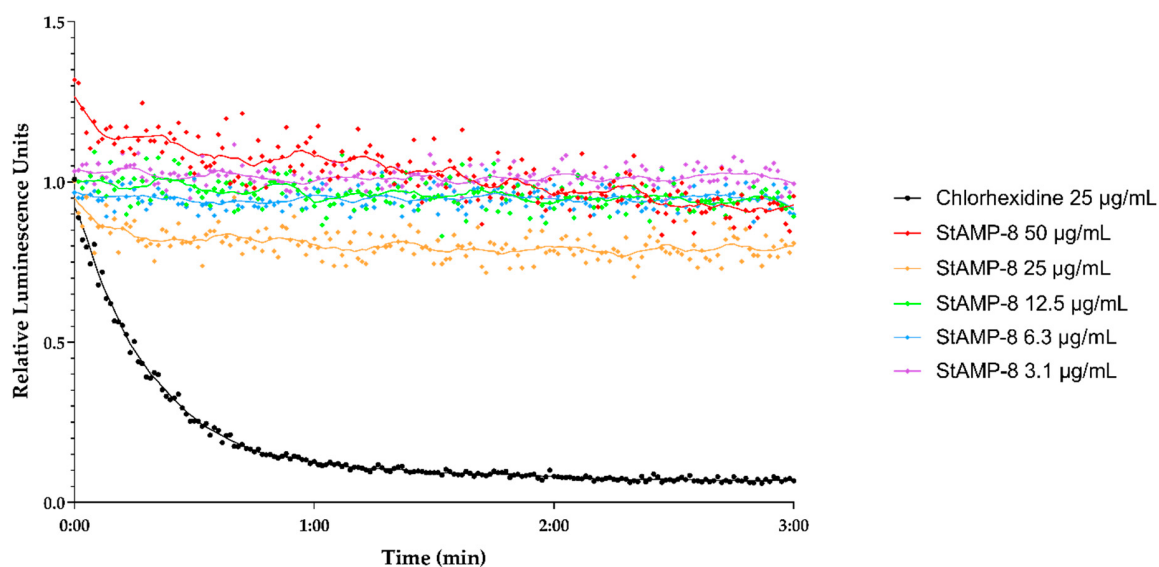

**Figure S10.** Kinetic of the antimicrobial effect on viability as measured by relative luminescence in *E. coli* (pCGLS-11) treated with chlorhexidine and different concentration of **StAMP-8**.

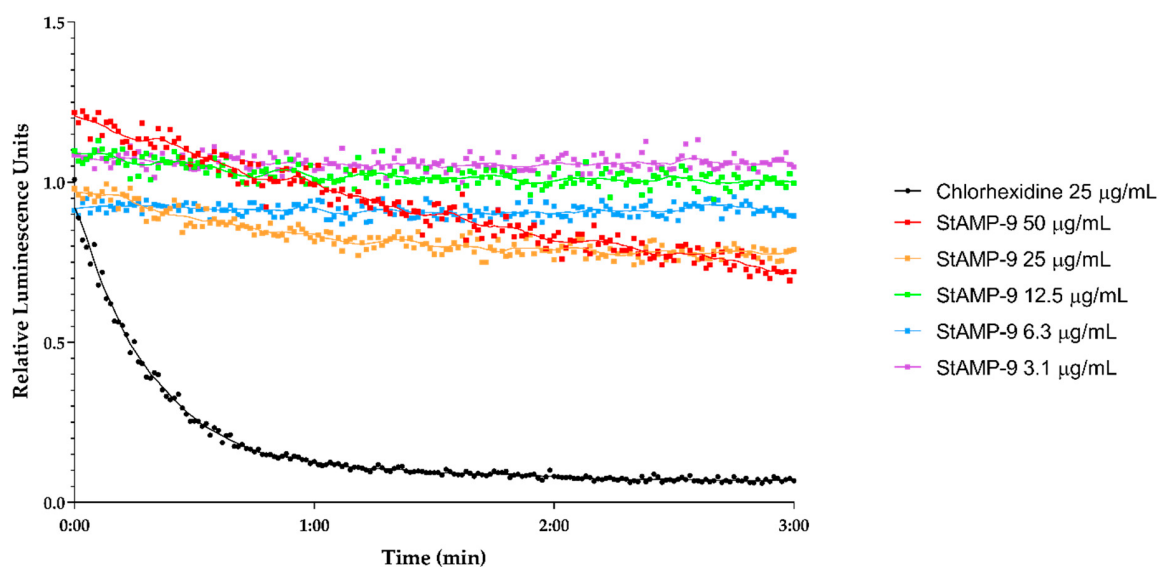

**Figure S11.** Kinetic of the antimicrobial effect on viability as measured by relative luminescence in *E. coli* (pCGLS-11) treated with chlorhexidine and different concentration of StAMP-9.

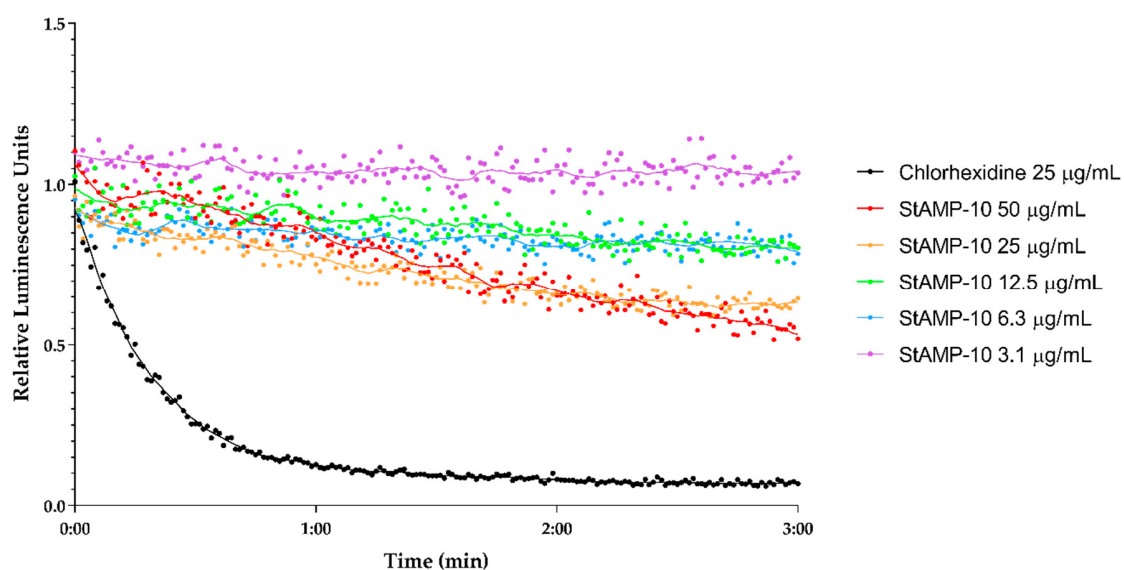

**Figure S12.** Kinetic of the antimicrobial effect on viability as measured by relative luminescence in *E. coli* (pCGLS-11) treated with chlorhexidine and different concentration of StAMP-10.

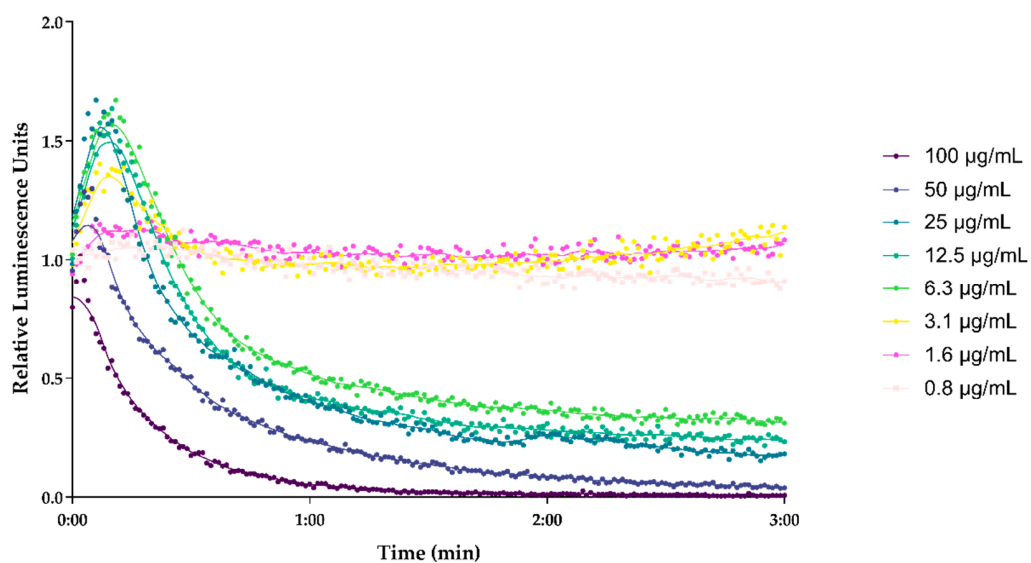

**Figure S13.** Kinetic of the antimicrobial effect on membrane integrity as measured by relative luminescence in *B. subtilis* (pCSS962) treated with different concentration of chlorhexidine.

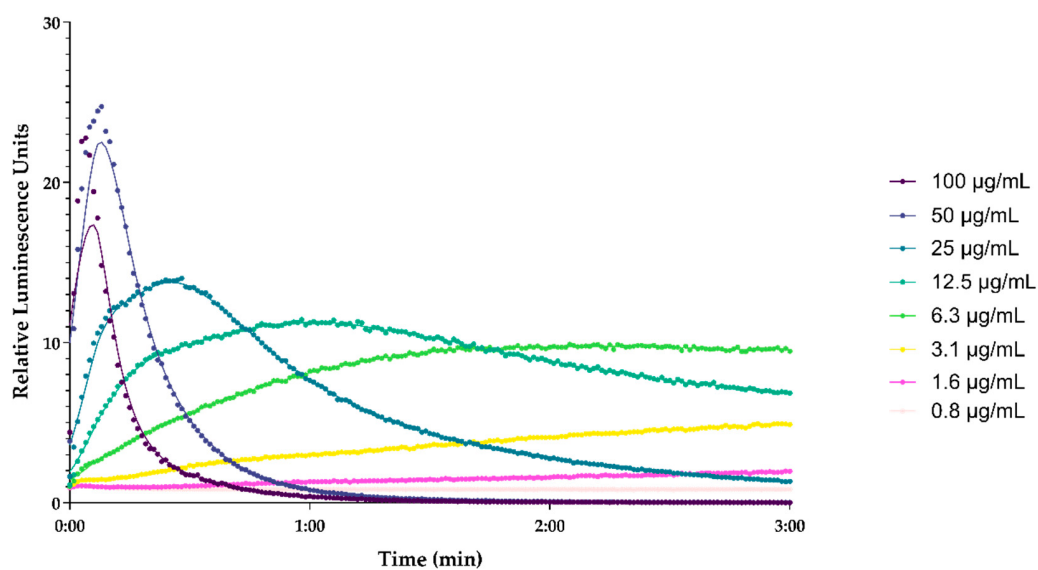

**Figure S14.** Kinetic of the antimicrobial effect on membrane integrity as measured by relative luminescence in *E. coli* (pCSS962) treated with different concentration of chlorhexidine.

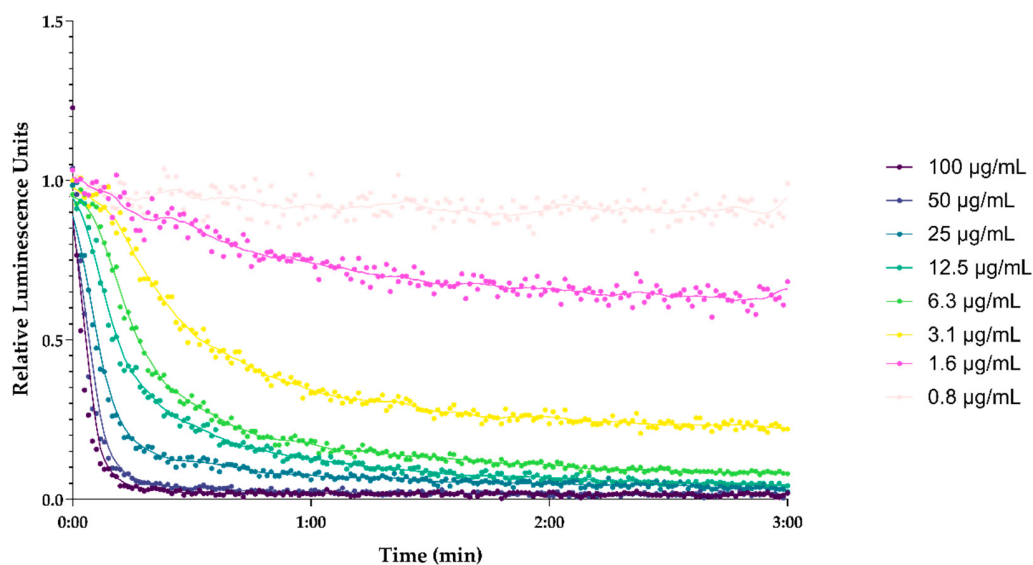

**Figure S15.** Kinetic of the antimicrobial effect on viability as measured by relative luminescence in *B. subtilis* (pCGLS-11) treated different concentration of chlorhexidine.

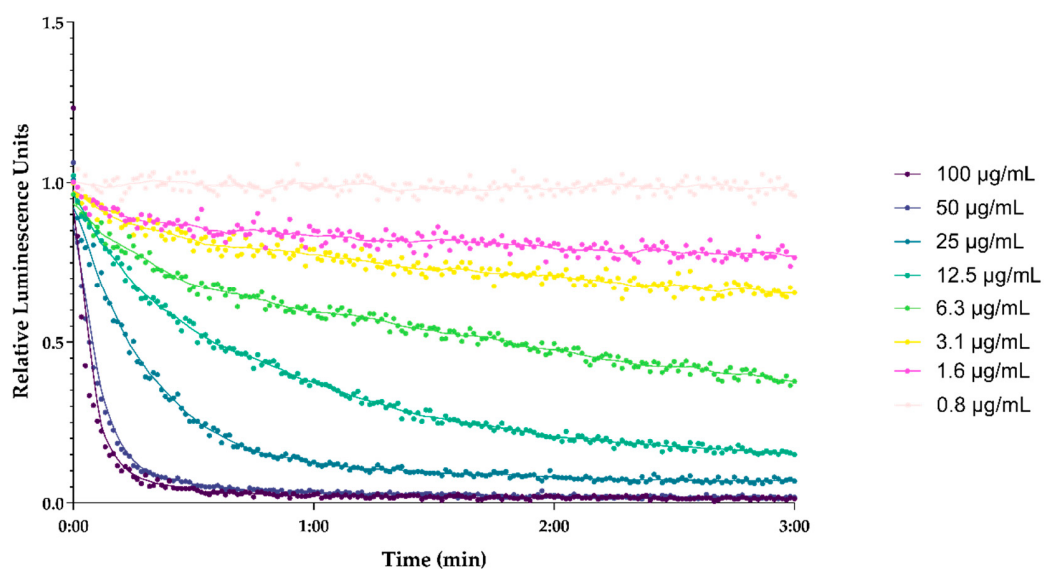

**Figure S16.** Kinetic of the antimicrobial effect on viability as measured by relative luminescence in *E. coli* (pCGLS-11) treated different concentration of chlorhexidine.

**Table S1.** Antimicrobial activity prediction of the designed StAMPs. SVM: support vector machines; RF: random forests; ANN: artificial neural networks; and DA: discriminant analysis.

| Peptide  | Sequence   | CAMP <sub>R3</sub> |       |     |       | ADAM |
|----------|------------|--------------------|-------|-----|-------|------|
|          |            | SVM                | RF    | ANN | DA    | SVM  |
| StAMP-1  | GKKPGGWKAK | 0.968              | 0.559 | AMP | 0.884 | 2.85 |
| StAMP-2  | GKKWGGWKAK | 0.998              | 0.533 | AMP | 0.887 | 3.23 |
| StAMP-3  | GKKPWGWKAK | 0.999              | 0.625 | AMP | 0.979 | 2.85 |
| StAMP-4  | GKKPGWWKAK | 0.997              | 0.623 | AMP | 0.979 | 2.85 |
| StAMP-5  | GKKWWGWKAK | 1.000              | 0.605 | AMP | 0.980 | 3.14 |
| StAMP-6  | GKKWGWKAK  | 1.000              | 0.605 | AMP | 0.980 | 3.14 |
| StAMP-7  | GKKPWWKAK  | 1.000              | 0.724 | AMP | 0.997 | 2.79 |
| StAMP-8  | GKKWWWWKAK | 1.000              | 0.830 | AMP | 0.998 | 2.90 |
| StAMP-9  | GRRPWWWRAR | 0.999              | 0.634 | AMP | 0.993 | 1.36 |
| StAMP-10 | GRRWWWRAR  | 1.000              | 0.649 | AMP | 0.995 | 1.97 |
| StAMP-11 | GRRPLLLRAR | 0.918              | 0.583 | AMP | 0.907 | 1.82 |

**Table S2.** Molecular weight and purity of the StAMPs.

| Peptide  | Molecular weight<br>(g/mol) | Purity<br>(%) |
|----------|-----------------------------|---------------|
| StAMP-1  | 1055.28                     | 97            |
| StAMP-2  | 1144.37                     | 98            |
| StAMP-3  | 1184.44                     | 98            |
| StAMP-4  | 1184.44                     | 98            |
| StAMP-5  | 1273.53                     | 95            |
| StAMP-6  | 1273.53                     | 98            |
| StAMP-7  | 1313.59                     | 99            |
| StAMP-8  | 1402.69                     | 100           |
| StAMP-9  | 1425.65                     | 100           |
| StAMP-10 | 1514.74                     | 100           |
| StAMP-11 | 1206.49                     | 97            |
